# Supplementary material for: A novel boronic acid-based fluorescent sensor for selectively recognizing Fe3+ ion in real time
Source: Royal Society of Chemistry journal article supplement (doi:10.1039/c9ra03978c), 2019-01-01
Supplement: c9ra03978c1.pdf [file c9ra03978c1.pdf]

## Electronic Supplementary Information (ESI)

### A novel boronic acid-based fluorescent sensor for selectively recognizing Fe<sup>3+</sup> ion in real time

Guiqian Fang,<sup>a, b, c, d</sup> Hao Wang,<sup>a, b, c, d</sup> Zhancun Bian,<sup>a, b, c, d</sup> Guo Min,<sup>e</sup> Zhongyu Wu<sup>\*a, b, c, d</sup> and Qingqiang Yao<sup>\*a, b, c, d</sup>

a. School of Medicine and Life Sciences, University of Jinan-Shandong Academy of Medical Sciences, Jinan 250200, Shandong, China

b. Institute of Materia Medica, Shandong Academy of Medical Sciences, Jinan 250062, Shandong, China

c. Key Laboratory for Biotech-Drugs Ministry of Health, Jinan 250062, Shandong, China

d. Key Laboratory for Rare & Uncommon Diseases of Shandong Province, Jinan 250062, Shandong, China

e. Shandong Province Leather Industrial Research Institute, Jinan 250021, China

\*Corresponding authors: E-Mail: wu\_med@foxmail.com (Zhongyu Wu), yao\_imm@163.com (Qingqiang Yao)

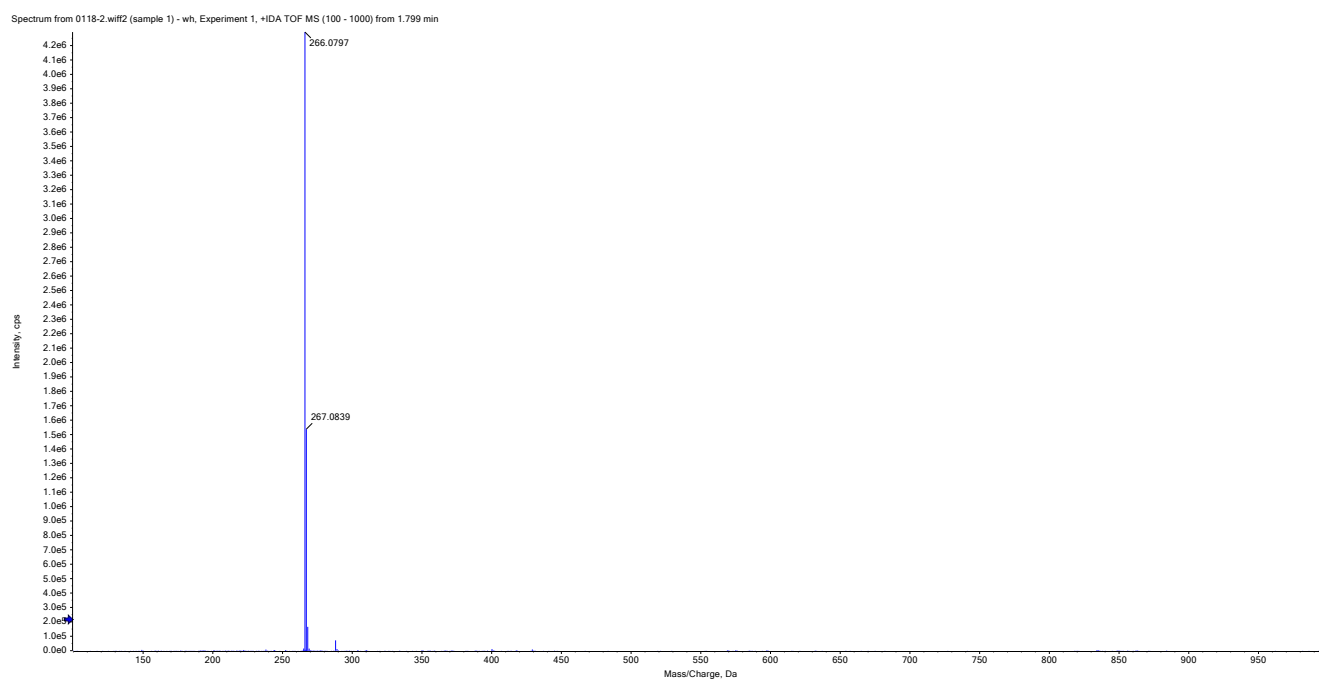

Fig. S1 HRMS spectrum of compound 2

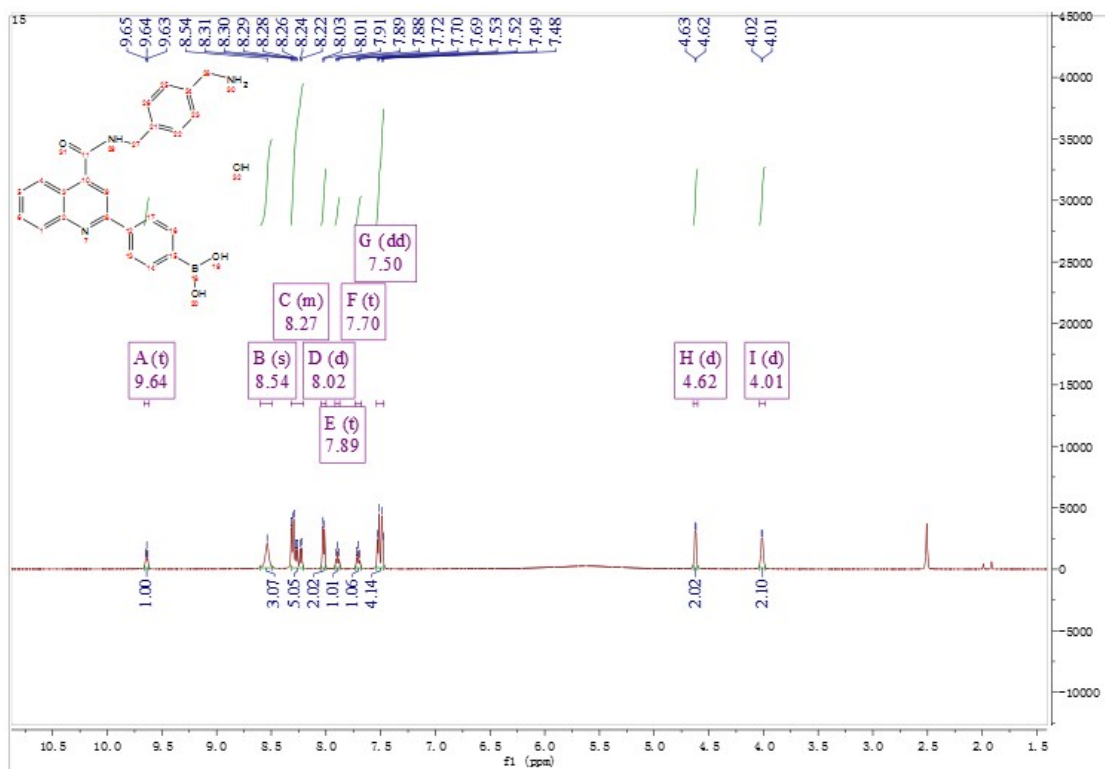

Fig. S2 <sup>1</sup>H NMR spectrum of 3

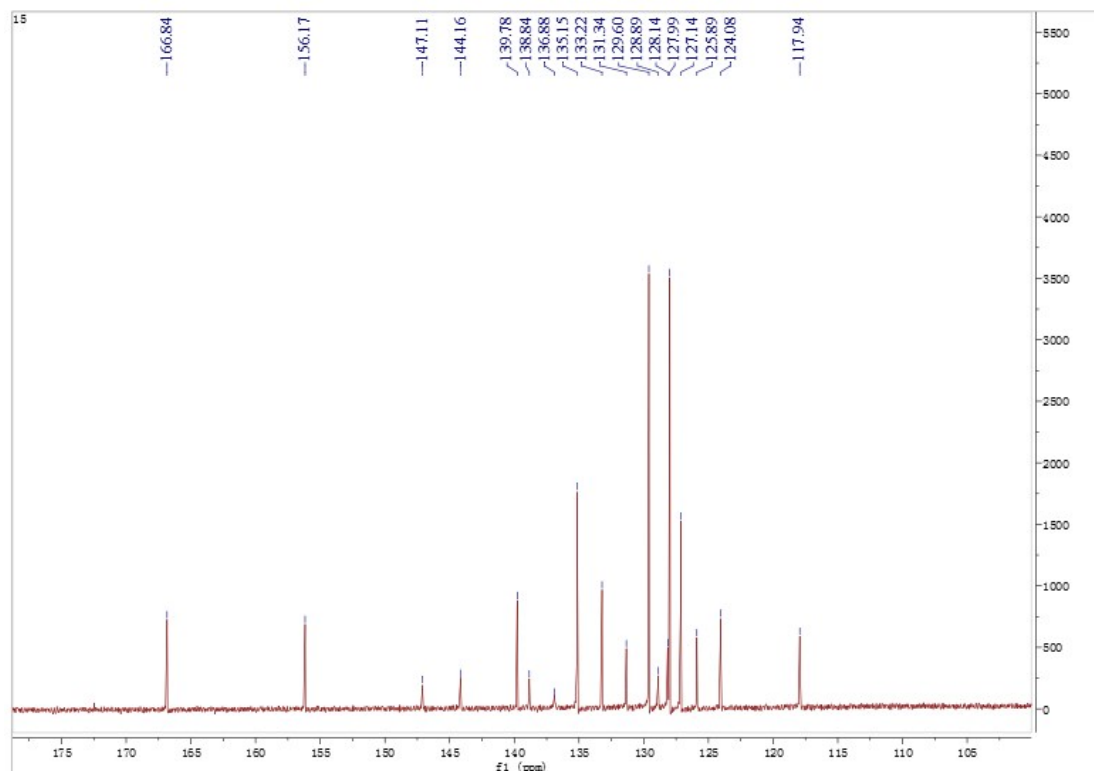

Fig. S3 <sup>13</sup>C NMR spectrum of 3

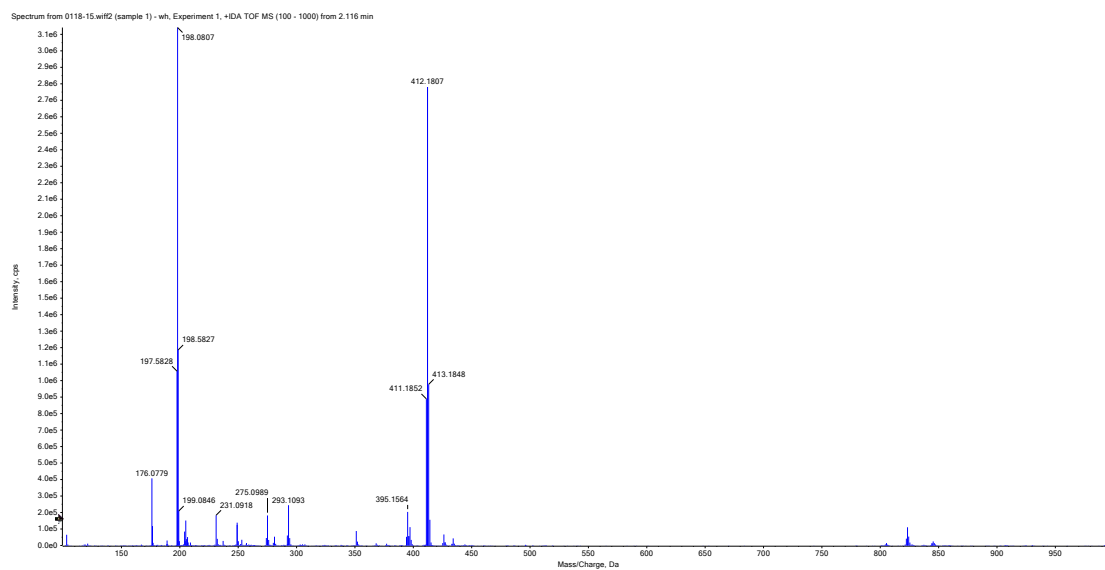

Fig. S4 HRMS spectrum of compound 3

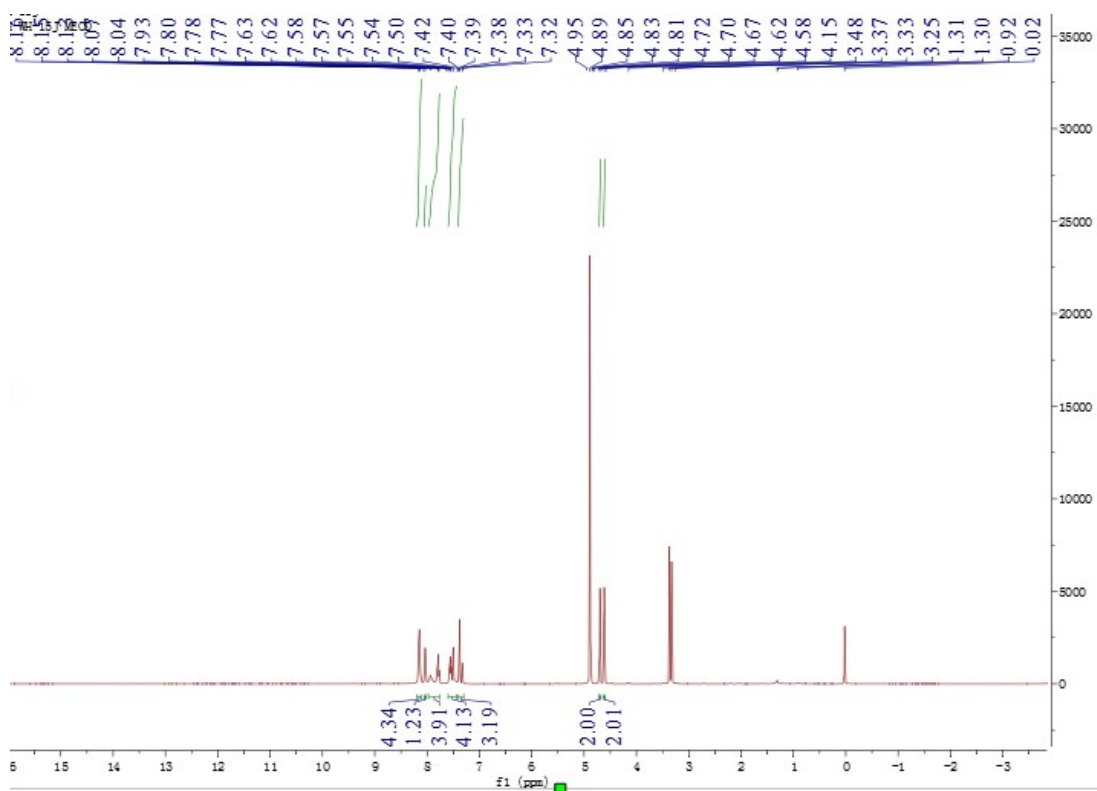

Fig. S5 <sup>1</sup>H NMR spectrum of 4

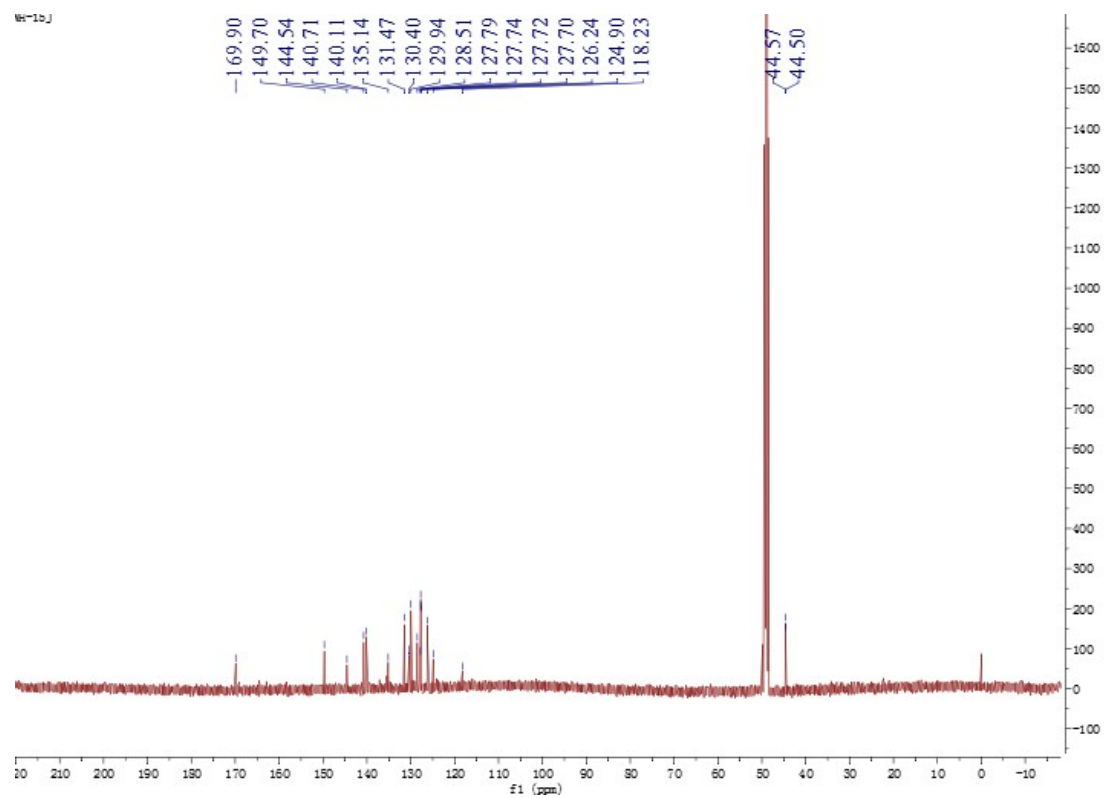

**Fig. S6**  $^{13}\text{C}$  NMR spectrum of **4**

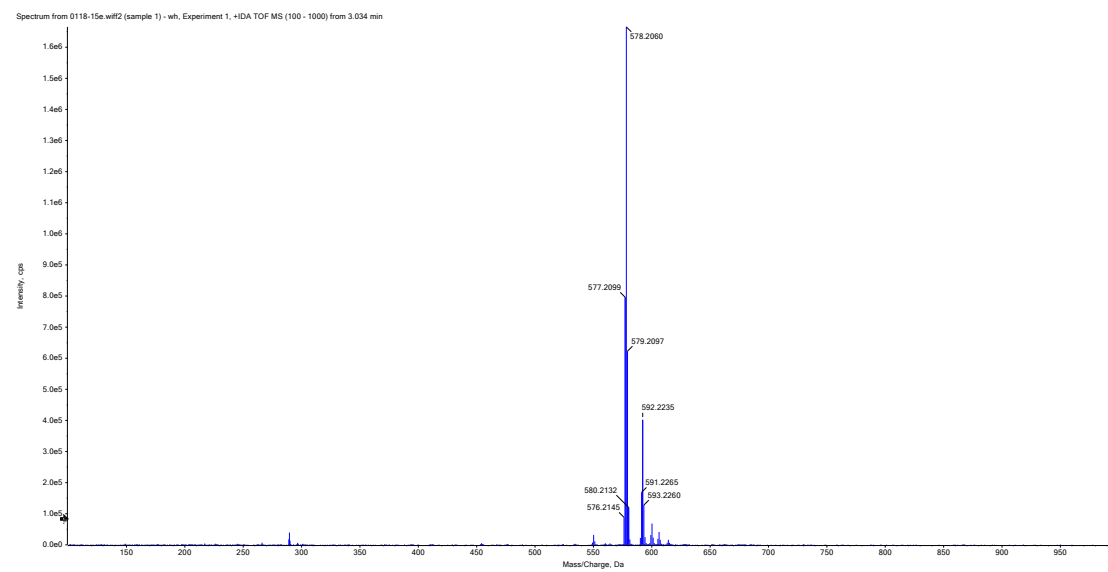

**Fig. S7** HRMS spectrum of compound **4**

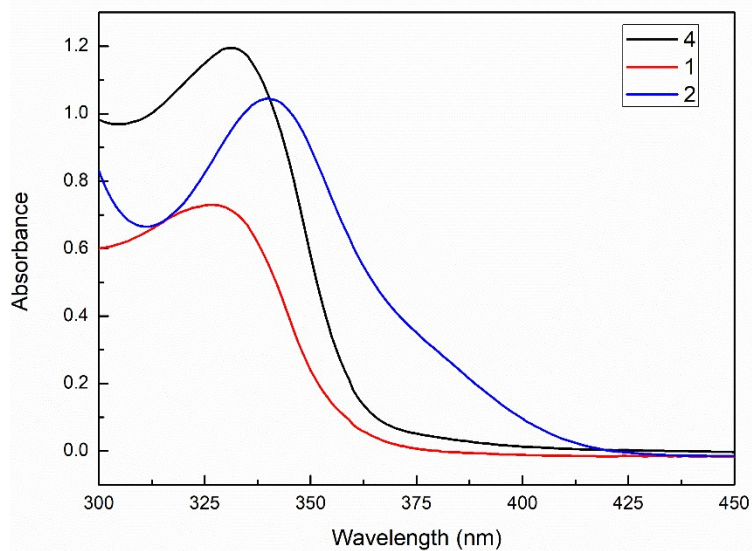

**Fig. S8** UV-vis absorption spectra of sensor **1**, **2** and **4** in DMSO/H<sub>2</sub>O (3:7, v/v).

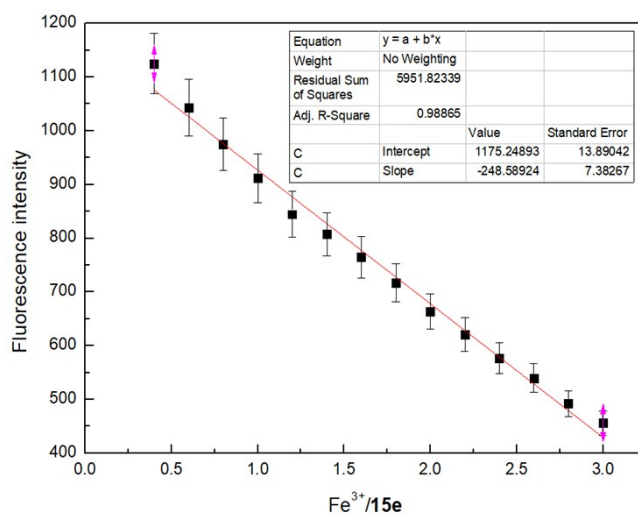

**Fig. S9** Linear relationship between sensor **4** and Fe<sup>3+</sup> ion in DMSO/H<sub>2</sub>O (3:7, v/v).

Linear Equation:  $Y = -248.58924X + 1175.24893$

$R^2 = 0.98865$

$S = 2.4858924 \times 10^6$

$$\delta = \sqrt{\frac{\sum (F_i - F_0)^2}{N - 1}} = 5.0 \quad (N=10) \quad K=3$$

$LOD = K \times \delta / S = 6.0 \times 10^{-6} \text{ M}$

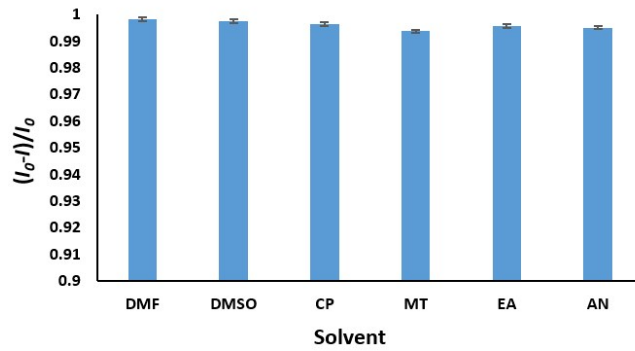

**Fig. S10** Relative fluorescence intensity of sensor **4** ( $1 \times 10^{-4}$  M) in the presence of 10 equiv. of  $\text{Fe}^{3+}$  ion in different polar solvents / DMSO (9:1, v/v) solution, at room temperature. From left to right: N, N-dimethylformamide (DMF), dimethylsulfoxide (DMSO), acetone (CP), methyl alcohol (MT), ethyl alcohol (EA), acetonitrile (AN).

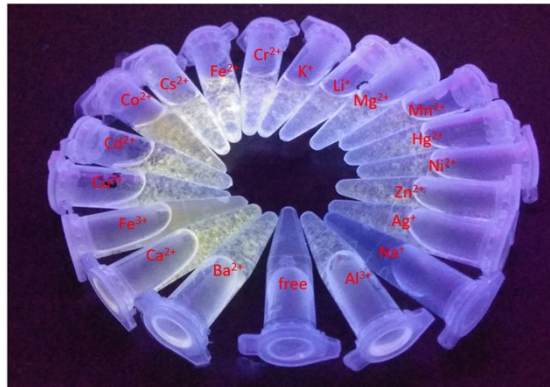

**Fig. S11** Photograph of **4** ( $10^{-4}$  M) upon adding 10 equiv. of various ions in DMSO/ $\text{H}_2\text{O}$  (1:9, v/v) which was observed under a UV-lamp (365 nm).

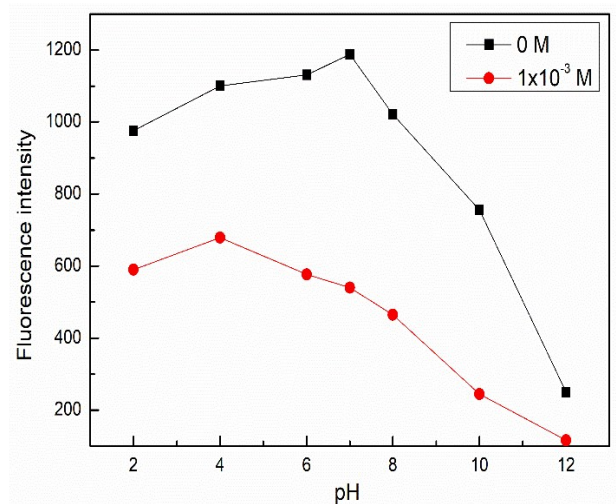

**Fig. S12** Fluorescence responses of sensor **4** ( $1 \times 10^{-4}$  M) to  $\text{Fe}^{3+}$  ion in DMSO/ $\text{H}_2\text{O}$  (3:7, v/v, phosphate buffer, 0.1 M) at different pH values. Concentrations of  $\text{Fe}^{3+}$  ion are given in the plot.

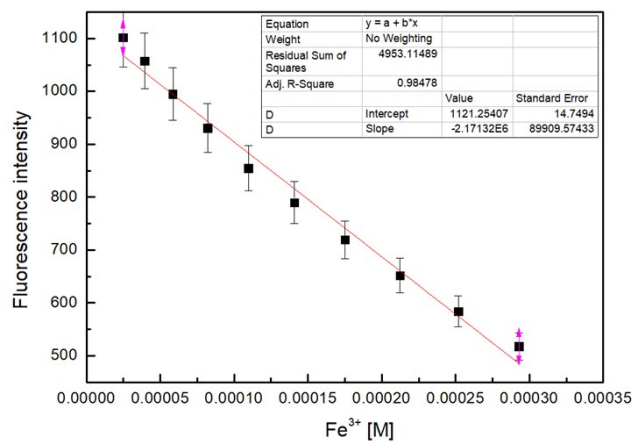

**Fig. S13** Linear relationship between sensor **4** and  $\text{Fe}^{3+}$  ion in rabbit plasma

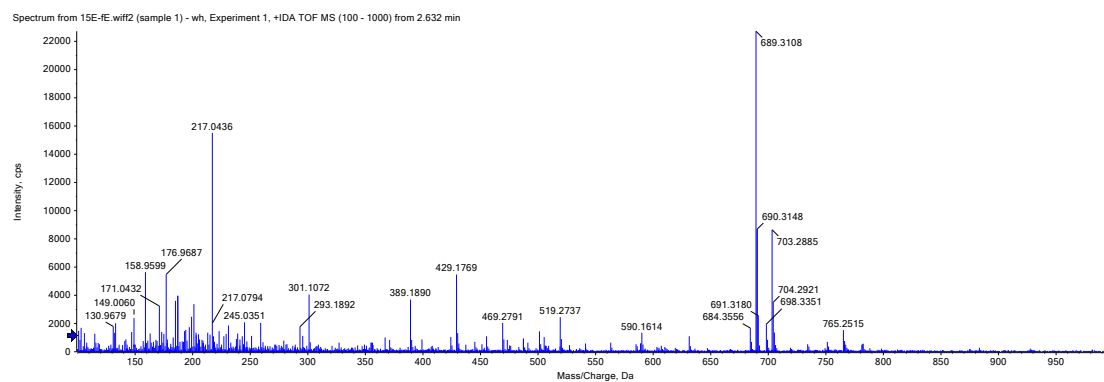

**Fig. S14** HRMS spectrum of compound **4-2Fe<sup>3+</sup>** (calculated 689.0658, found 689.3108).

**Table1** Key information of some reported  $\text{Fe}^{3+}$  sensors

|                                         | Sensor                                                                              | Buffer                                 | Response time | LOD                      |
|-----------------------------------------|-------------------------------------------------------------------------------------|----------------------------------------|---------------|--------------------------|
| Gao <i>et al.</i> reported <sup>1</sup> | 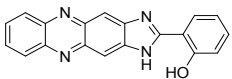 | $\text{CH}_3\text{CN}$ /HEPES(1:4)     | 60 min        | $4.8 \times 10^{-6}$ M   |
| Bao <i>et al.</i> reported <sup>2</sup> |  | $\text{MeOH}/\text{H}_2\text{O}$ (3:2) | 10min         | $0.031 \times 10^{-6}$ M |

|                                                       |                                                                                     |                                |                               |                           |
|-------------------------------------------------------|-------------------------------------------------------------------------------------|--------------------------------|-------------------------------|---------------------------|
| Sepay <i>et al.</i><br>reported <sup>3</sup>          | 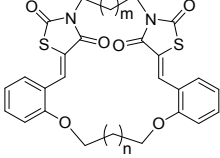   | Ethanol/H <sub>2</sub> O (3:1) | No data                       | 9.8×10 <sup>-6</sup> M    |
| Nandre <i>et al.</i><br>reported <sup>4</sup>         |    | MeOH                           | No data                       | 0.6×10 <sup>-6</sup> M    |
| Kar <i>et al.</i><br>reported <sup>5</sup>            |    | CH <sub>3</sub> CN/HEPES(1:4)  | 1 min                         | 4.0×10 <sup>-6</sup> M    |
| Li <i>et al.</i><br>reported <sup>6</sup>             |    | THF/H <sub>2</sub> O (1:1)     | No data                       | 0.38 × 10 <sup>-6</sup> M |
| García-Beltrán <i>et al.</i><br>reported <sup>7</sup> |   | DMSO/HEPES(1:99)               | 6 min                         | 51.7 × 10 <sup>-6</sup> M |
| Dai <i>et al.</i><br>reported <sup>8</sup>            |  | DMSO/HEPES(3:1)                | No data                       | 91.1×10 <sup>-6</sup> M   |
| Yao <i>et al.</i><br>reported <sup>9</sup>            |  | H <sub>2</sub> O               | No data                       | No data                   |
| Our sensor 4                                          |  | DMSO/ H <sub>2</sub> O (3:7)   | Within a record time (0.5min) | 5.8×10 <sup>-6</sup> M    |

1. G. Y. Gao, W. J. Qu, B. B. Shi, P. Zhang, Q. Lin, H. Yao, W. L. Yang, Y. M. Zhang and T. B. Wei, *Spectrochimica Acta Part A Molecular & Biomolecular Spectroscopy*, 2014, **121**, 514-519.
2. X. Bao, J. Shi, X. Nie, B. Zhou, X. Wang, L. Zhang, H. Liao and T. Pang, *Bioorganic & Medicinal*



- Chemistry*, 2014, **22**, 4826-4835.
3. N. Sepay, S. Mallik, P. C. Saha and A. K. Mallik, *New Journal of Chemistry*, 2018, **42**, 15270-15276.
  4. J. Nandre, S. Patil, P. Patil, S. Sahoo, C. Redshaw, P. Mahulikar and U. Patil, *Journal of Fluorescence*, 2014, **24**, 1563-1570.
  5. C. Kar, S. Samanta, S. Mukherjee, B. K. Datta, A. Ramesh and G. Das, *New Journal of Chemistry*, 2014, **38**, 2660-2669.
  6. Z. Li, Y. Zhou, K. Yin, Z. Yu, Y. Li and J. Ren, *Dyes & pigments*, 2014, **105**, 7-11.
  7. O. García-Beltrán, B. K. Cassels, C. Pérez, N. Mena, M. T. Núñez, N. P. Martínez, P. Pavez and M. E. Aliaga, *Sensors*, 2014, **14**, 1358-1371.
  8. Y. Dai, K. Xu, C. Wang, X. Liu and P. Wang, *Supramolecular Chemistry*, 2017, **29**, 315-322.
  9. J. Yao, W. Dou, W. Qin and W. Liu, *Inorganic Chemistry Communications*, 2009, **12**, 116-118.
